# Supplementary material for: CNT-Type Dependent Cellular Adhesion on 3D-Printed Nanocomposite for Tissue Engineering
Source: PubMed Central journal article supplement — Int J Bioprint. 2022 Mar 29;8(2):548. doi: 10.18063/ijb.v8i2.548 (PMC9159483; doi:10.18063/ijb.v8i2.548), 2022-03-29
Supplement: IJB-8-2-548-s001.pdf [file IJB-8-2-548-s001.pdf]

## Supplementary File

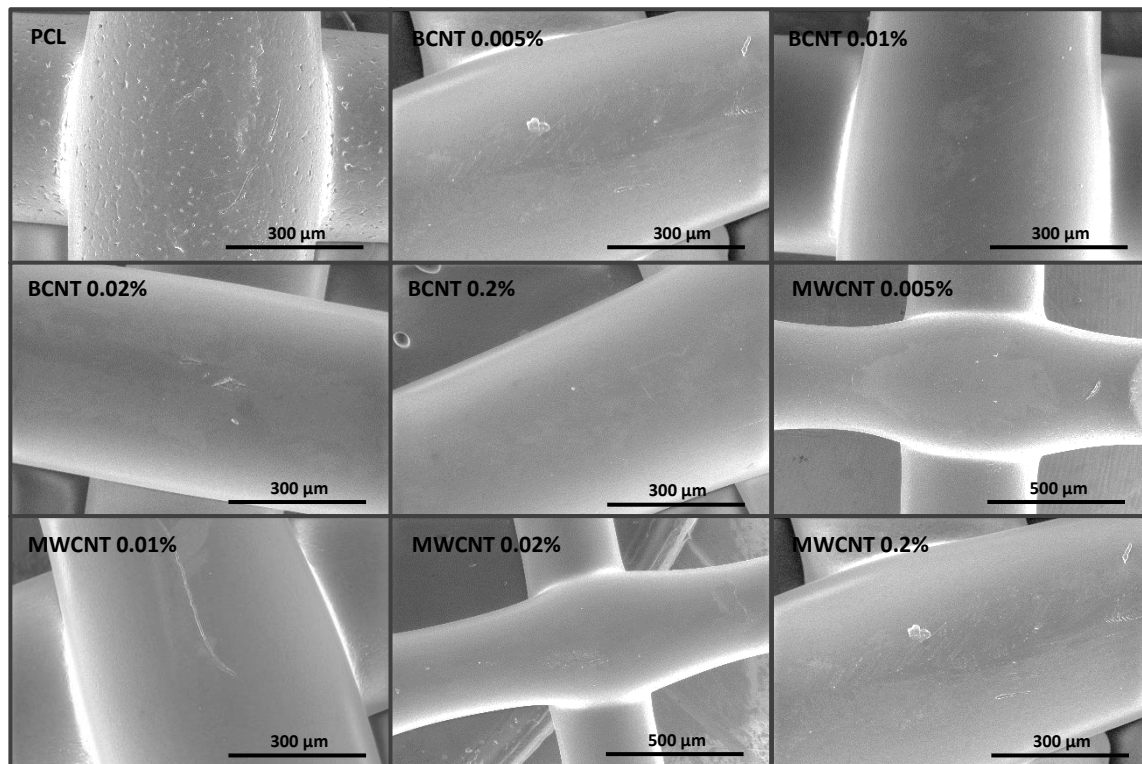

**Figure S1.** SEM images of 3D-printed grids

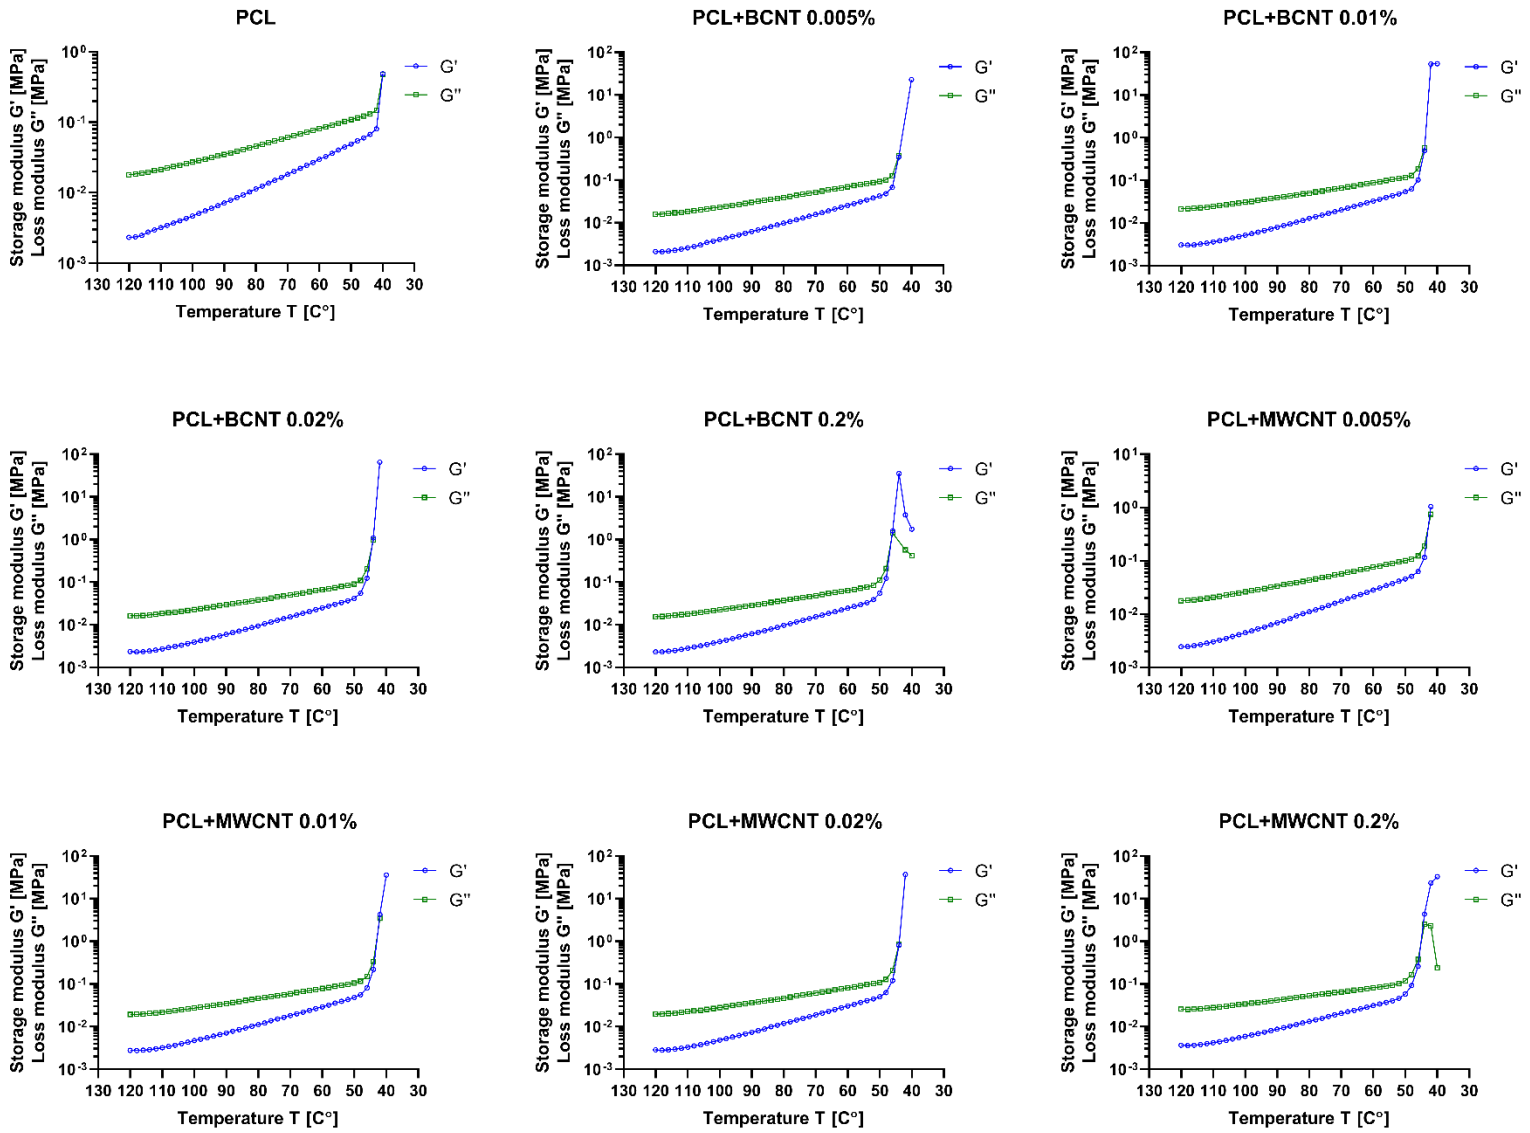

Figure S2. Temperature sweep analysis for 120–40°C range

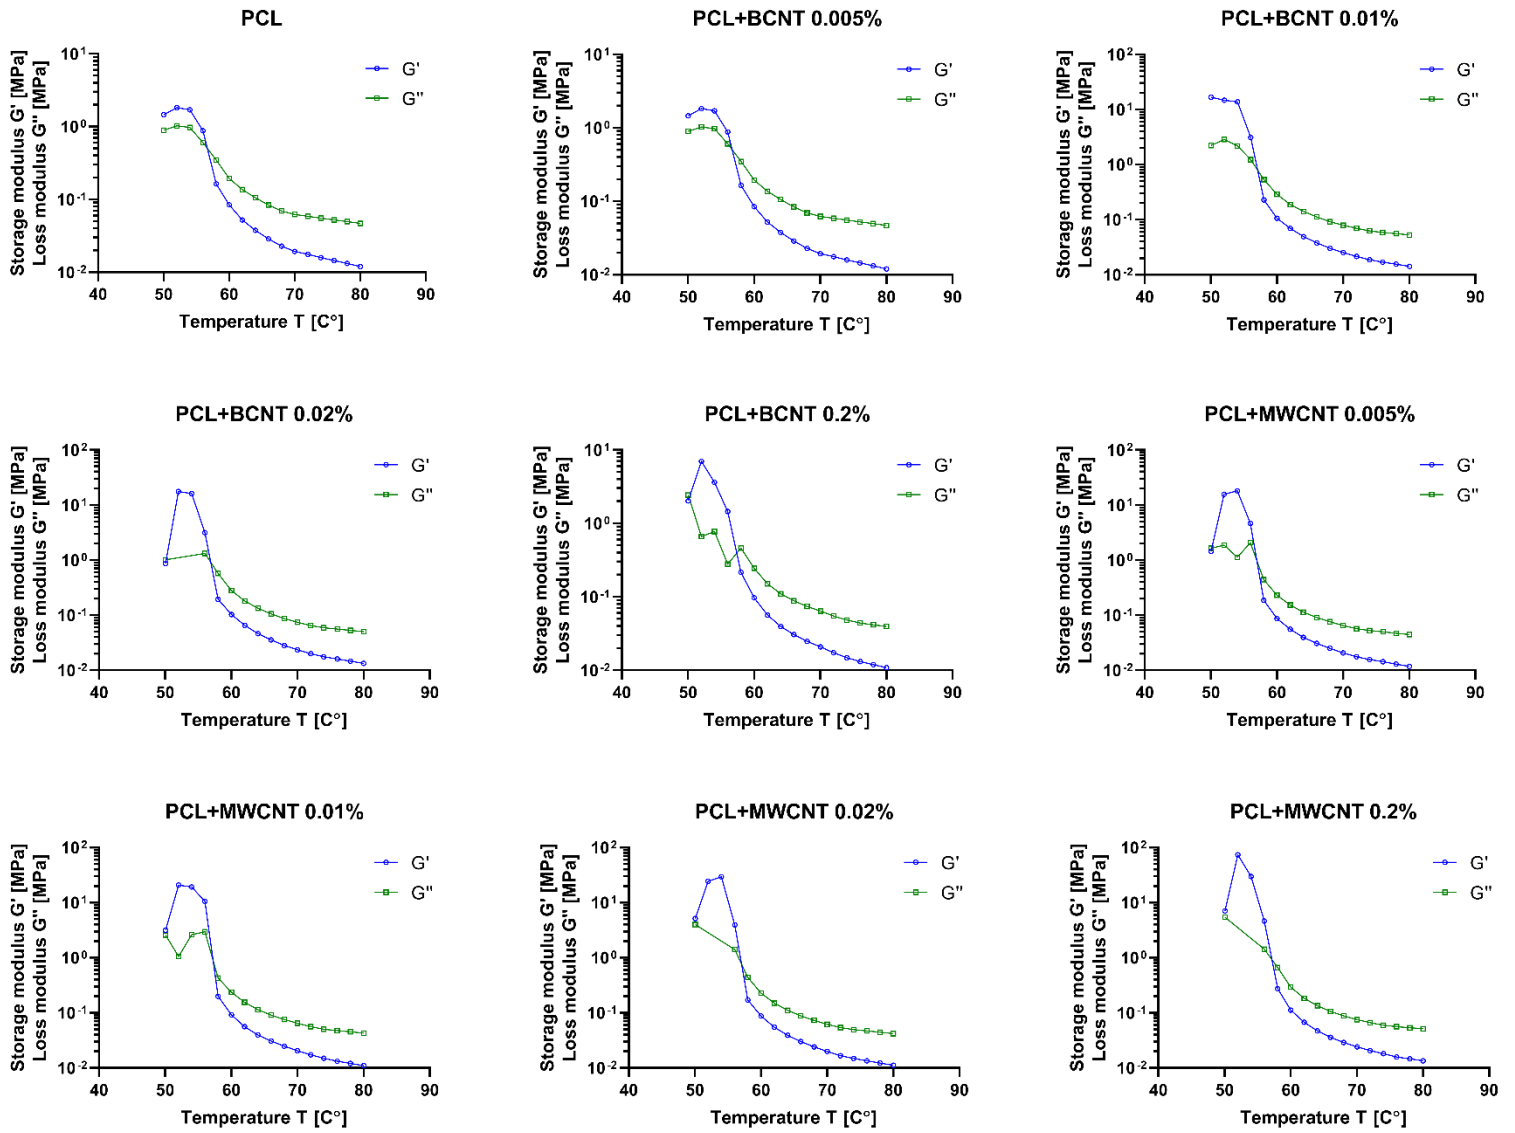

Figure S3. Temperature sweep analysis for 50–80°C range

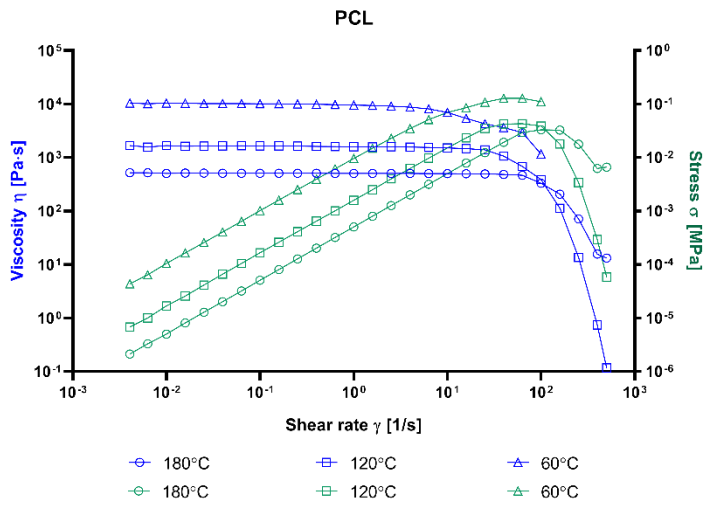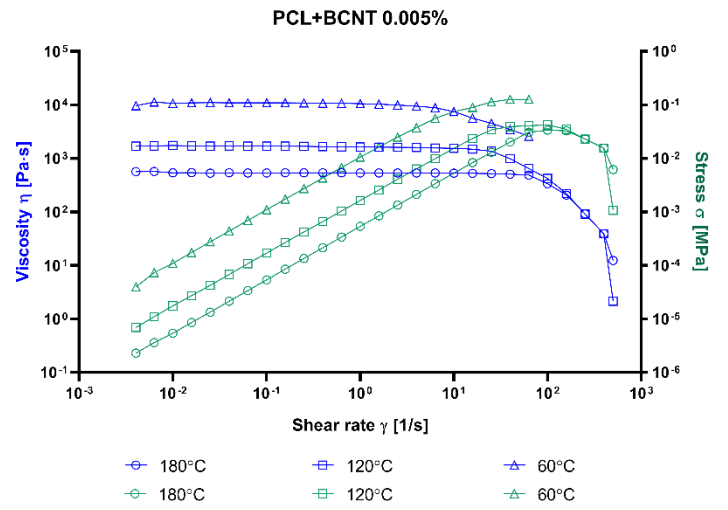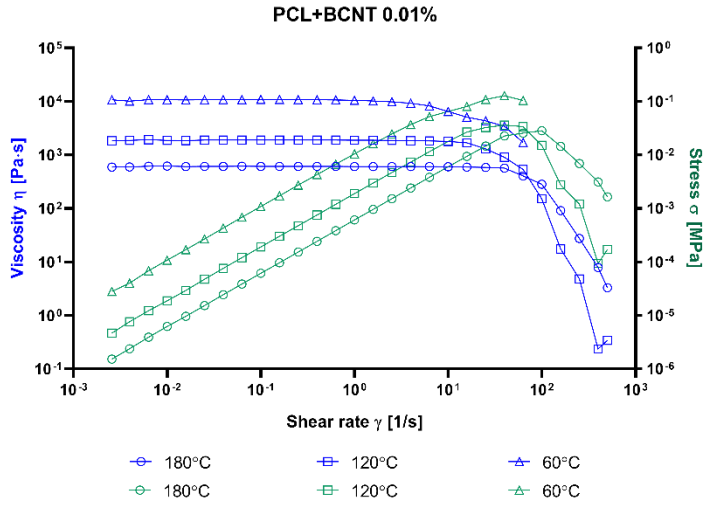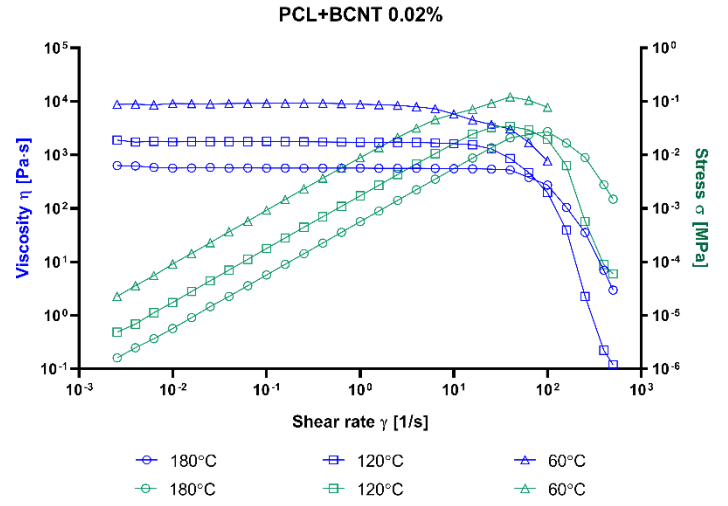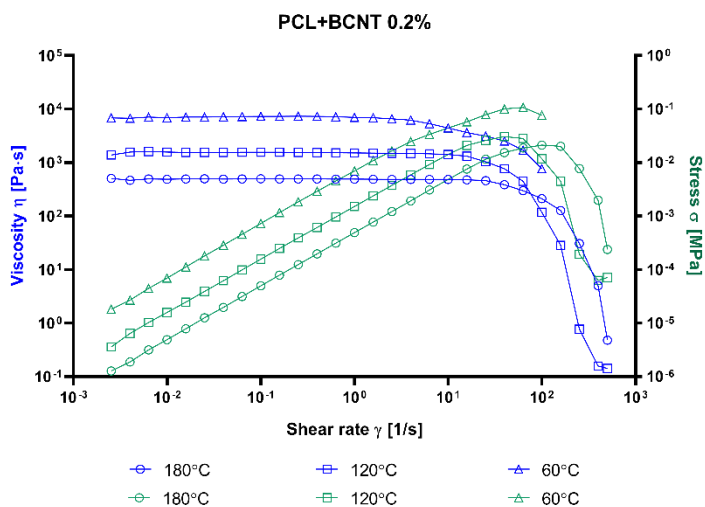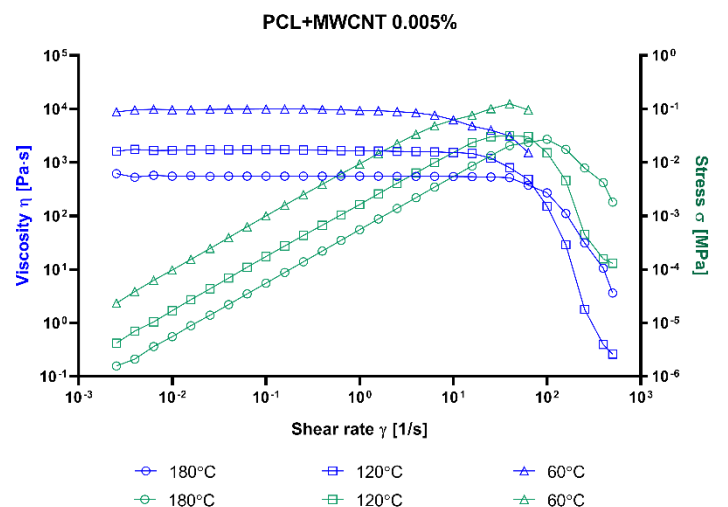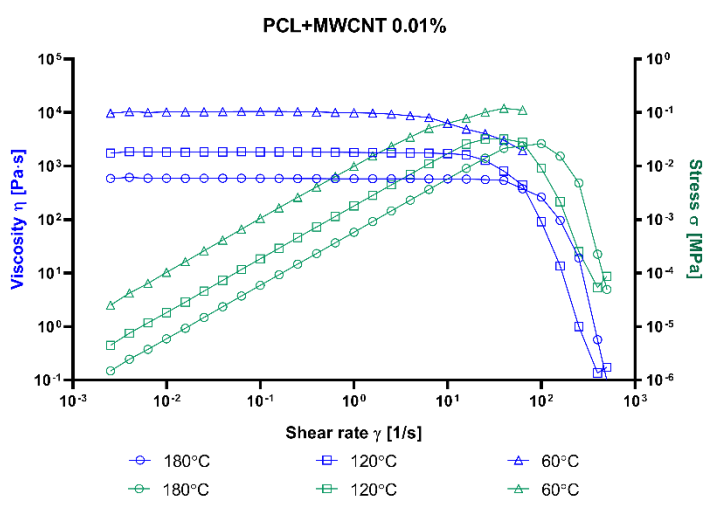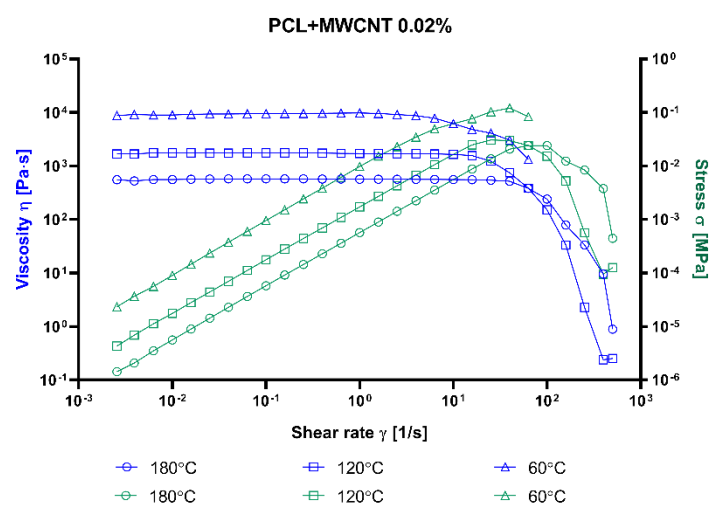

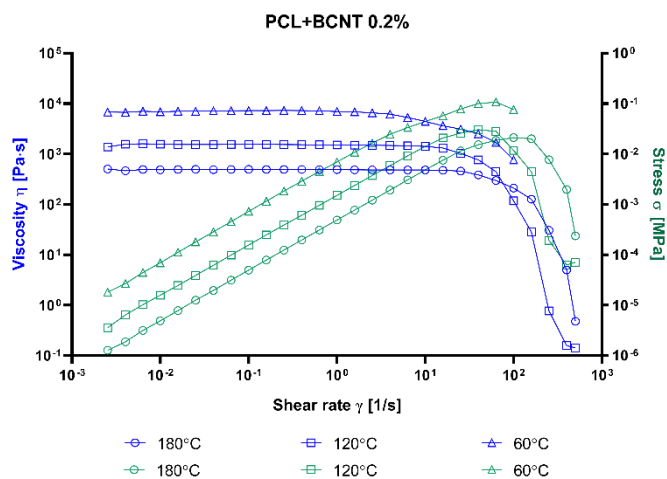

**Figure S4.** Flow sweep analysis at 180°C, 120°C and 60°C

**Table S1.** Results of the CellTiter-Glo 2.0 cell viability assay.

| Pair                 | Statistical significance |        |
|----------------------|--------------------------|--------|
|                      | 3 days                   | 6 days |
| PCL vs. Ctrl         | ***                      | **     |
| PCL vs. BCNT 0.005%  | ***                      | ns     |
| PCL vs. BCNT 0.01%   | ns                       | **     |
| PCL vs. BCNT 0.02%   | ns                       | ns     |
| PCL vs. BCNT 0.2%    | ***                      | ***    |
| PCL vs. MWCNT 0.005% | **                       | **     |
| PCL vs. MWCNT 0.01%  | *                        | ***    |
| PCL vs. MWCNT 0.02%  | ns                       | ns     |
| PCL vs. MWCNT 0.2%   | *                        | ***    |

Statistical analysis was performed using one-way Anova and post -hoc Dunnett`s T3 multiple comparisons test. The mean of each column was compared to the mean of PCL column.

CI=95%, P value: 0.12 (ns), 0.033(\*), 0.002 (\*\*), <0.001 (\*\*\*)).
